# Supplementary material for: Effect of Soybean Protein Isolate-7s on Delphinidin-3-O-Glucoside from Purple Corn Stability and Their Interactional Characterization
Source: MDPI journal article supplement (doi:10.3390/foods11070895), 2022-03-22
Supplement: s1 [file s1]

Figure S1: HPLC chromatograms of delphinidin-3-*O*-glucoside monomer

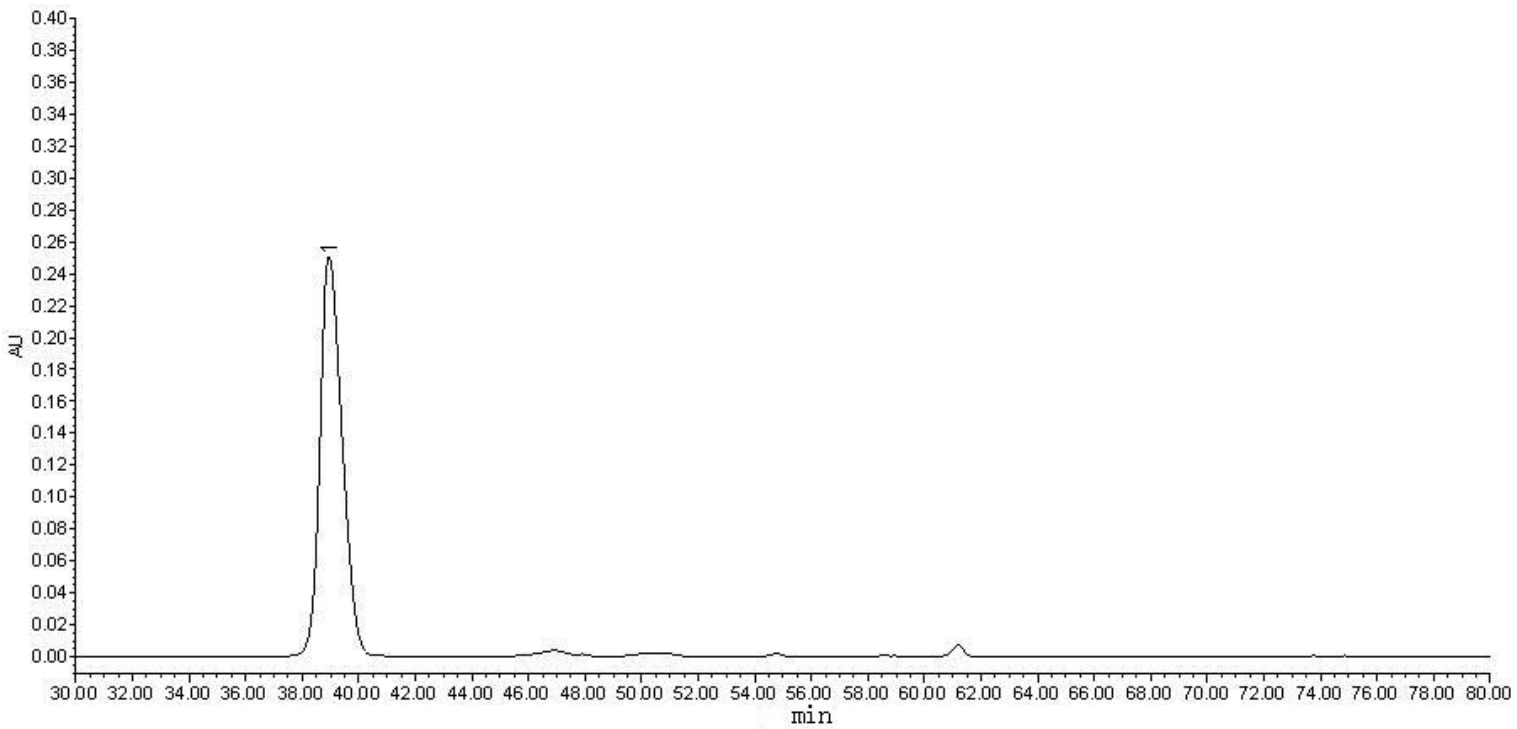

Table S1: Optimum design of soybean protein isolate-7s-delphinidin-3-O-glucoside stabilization system (pH 6.8) (mean ± SD) (n = 3)

| No. | A: Complex proportion | B: Reaction temperature (°C) | C: Reaction time (min) | Abs <sup>‡</sup> |  |  |
|-----|-----------------------|------------------------------|------------------------|------------------|--|--|
| 1   | -1 (40:1)             | -1 (50)                      | 0 (60)                 | 0.605            |  |  |
| 2   | 1 (30:1)              | -1                           | 0                      | 0.677            |  |  |
| 3   | -1                    | 1 (70)                       | 0                      | 0.684            |  |  |
| 4   | 1                     | 1                            | 0                      | 0.706            |  |  |
| 5   | -1                    | 0 (60)                       | -1 (30)                | 0.661            |  |  |
| 6   | 1                     | 0                            | -1                     | 0.693            |  |  |
| 7   | -1                    | 0                            | 1 (90)                 | 0.656            |  |  |
| 8   | 1                     | 0                            | 1                      | 0.702            |  |  |
| 9   | 0 (20:1)              | -1                           | -1                     | 0.659            |  |  |
| 10  | 0                     | 1                            | -1                     | 0.701            |  |  |
| 11  | 0                     | -1                           | 1                      | 0.655            |  |  |
| 12  | 0                     | 1                            | 1                      | 0.709            |  |  |
| 13  | 0                     | 0                            | 0                      | 0.740            |  |  |
| 14  | 0                     | 0                            | 0                      | 0.747            |  |  |
| 15  | 0                     | 0                            | 0                      | 0.731            |  |  |
| 16  | 0                     | 0                            | 0                      | 0.714            |  |  |
| 17  | 0                     | 0                            | 0                      | 0.728            |  |  |

| Source                         | Sum of square | df     | Mean square | <i>F</i> value | <i>P</i> value | Significant     |
|--------------------------------|---------------|--------|-------------|----------------|----------------|-----------------|
| Model                          | 0.033         | 9      | 0.003632    | 23.55          | 0.002          | **              |
| A                              | 0.004465      | 1      | 0.004465    | 28.95          | 0.0010         | **              |
| B                              | 0.005460      | 1      | 0.005460    | 35.40          | 0.0006         | **              |
| C                              | 0.004805      | 1      | 0.004805    | 3.12           | 0.1209         |                 |
| AB                             | 0.005062      | 1      | 0.005062    | 3.28           | 0.1129         | *               |
| AC                             | 0.009000      | 1      | 0.009000    | 0.058          | 0.8160         |                 |
| BC                             | 0.006760      | 1      | 0.006760    | 4.38           | 0.0746         |                 |
| A <sup>2</sup>                 | 0.001220      | 1      | 0.001222    | 78.22          | 0.0001         | **              |
| B <sup>2</sup>                 | 0.004053      | 1      | 0.004053    | 26.28          | 0.0014         | **              |
| C <sup>2</sup>                 | 0.003019      | 1      | 0.003019    | 19.57          | 0.0031         | **              |
| Residual                       | 0.001080      | 7      | 0.001542    |                |                |                 |
| Lack of Fit                    | 0.001008      | 3      | 0.003358    | 0.14           | 0.9327         | Not significant |
| Pure Error                     | 0.009788      | 4      | 0.002447    |                |                |                 |
| Cor Total                      | 0.034         | 16     |             |                |                |                 |
| R <sup>2</sup> <sub>adj</sub>  |               | 0.9269 |             |                |                |                 |
| R <sup>2</sup> <sub>Pred</sub> |               | 0.9070 |             |                |                |                 |
| C.V./%                         |               | 1.73   |             |                |                |                 |

SPI-7s-D3G<sup>†</sup>: The complex of soybean protein isolate-7s and delphinidin-3-*O*-glucoside; pH 6.8: The system of pH 6.8; Abs<sup>‡</sup>: Absorbance; \*: The

difference was significant ( $P < 0.05$ ); \*\*: The difference was extremely significant ( $P < 0.01$ ).
